# Supplementary material
Source: PubMed Central journal article supplement (PMC1563146)

Figure S1. HIP2-72 Does Not Block TfR Uptake  
TfR-Alexa 594 (red) uptake in nontransfected and dominant-negative AP180 (dnAP180) or GFP-HIP<sub>2-72</sub> (stained green) expressing HeLa cells showing that dominant-negative AP180, but not GFP-HIP<sub>2-72</sub>, blocks internalization.

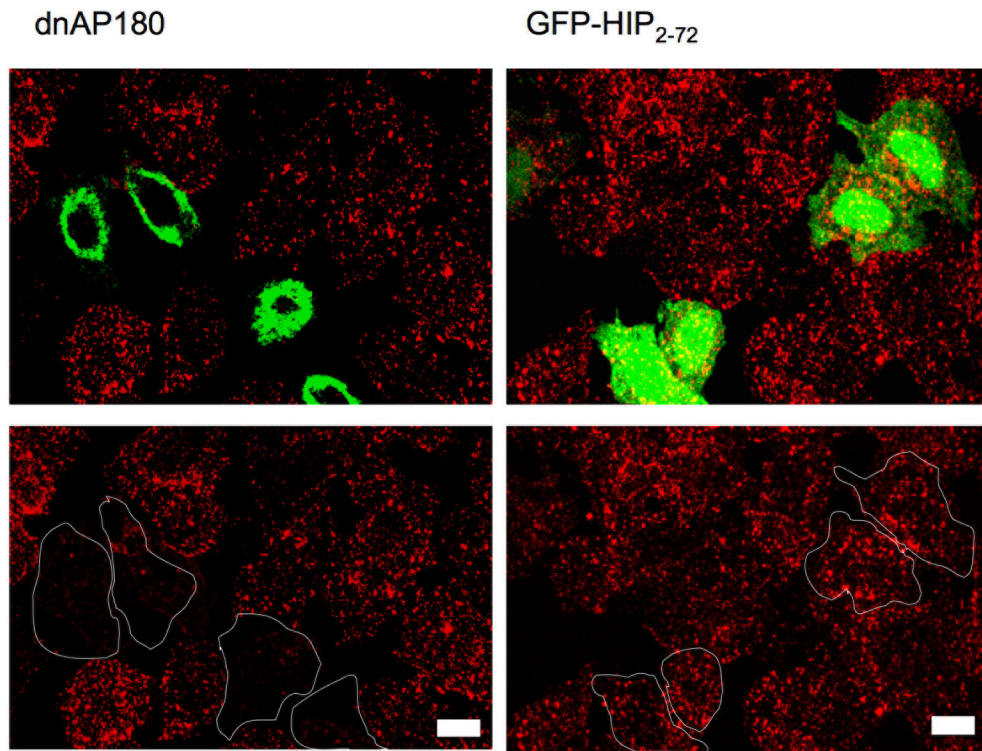

Supplement: NIHMS5442-supplement-SFig1.pdf [file NIHMS5442-supplement-SFig1.pdf]
